# Supplementary material
Source: ML conference proceedings conference paper supplement (https://openreview.net/forum?id=R5YFeJtnJf)
Supplement: supplementary_material [file ML4H_2025_Proceedings_DeRetSyn_submission_appendix_only.pdf › supplement/ML4H_2025_Proceedings_DeRetSyn_submission_appendix_only.pdf]

## Appendix A. Instruction prompt for QA generation from text fragments

You are an expert medical curriculum developer. Given a medical or medically-related text passage, you must generate question-answer pairs. The questions MUST be

- self-contained: answerable by the information in the passage but understandable on their own without needing direct reference to the passage (ie. "what is this passage about?" is NOT a valid question).
- grounded: directly related to the information in the passage
- research-able: have enough information to be able to retrieve the relevant passages or information in the future to help answer the question.

Generate a set of question-answer types including yes/no answer, short phrases, and longer sentences.

Think step-by-step and reason through the content of the passage to hypothesize potential question-answer pairs and then respond. Think of at least 8 question-answer pairs but more, if possible.

Respond in this format:

```
<think> You reasoning here... </think>
<qa-pair> [question here...] | [answer here...] </qa-pair>
<qa-pair> [question here...] | [answer here...] </qa-pair>
```

Here is an example:

PASSAGE:

The goal of transvesical prostatectomy is to remove the hypertrophic transitional zone of the prostate to reduce urinary obstruction. It is not a surgical procedure for malignant lesions. Appropriate history (including functional

status inquiry) and physical examination are done prior to any investigation. Physical exam always includes digital rectal exam. Enlarged lateral lobes can be easily felt and the rectal mucosa should move freely over the prostate. Any nodularity or fixation of the rectal mucosa should alert you to the possibility of prostatic cancer and core needle biopsy should be done before proceeding with the admission.

RESPONSE:

<think>

Okay, so I need to generate question-answer pairs based on the given medical passage. The questions should be answerable from the passage and understandable on their own. Let me read through the passage carefully to understand the key points.

The passage is about transvesical prostatectomy. It mentions that the goal is to remove the hypertrophic transitional zone of the prostate to reduce urinary obstruction. It's not for malignant lesions. Before any investigation, they do a history and physical exam, including a digital rectal exam. Enlarged lateral lobes can be felt, and the rectal mucosa should move freely. If there's nodularity or fixation, it might indicate cancer, so a biopsy is needed before admission.

Alright, so the main topics here are the purpose of the procedure, what it's not used for, the pre-procedure assessments, the physical exam findings, and when to suspect cancer.

I should think of questions that cover these areas. Let's start with the purpose. A question like, "What is the primary goal of transvesical prostatectomy?" The answer would be about removing the hypertrophic zone to relieve obstruction.

843 Next, since it's not for malignant  
844 lesions, a question could be, "Is  
845 transvesical prostatectomy used to  
846 treat malignant lesions of the  
847 prostate?" The answer would be no.  
848 Then, the pre-procedure steps. Maybe,  
849 "What assessments are typically  
850 performed before transvesical  
851 prostatectomy?" The answer would  
852 include history, physical exam, and  
853 digital rectal exam.

854 For the physical exam findings, a question  
855 could be, "What is a normal finding  
856 during the digital rectal exam in a  
857 patient undergoing transvesical  
858 prostatectomy?" The answer would  
859 mention enlarged lateral lobes and  
860 freely moving rectal mucosa.

861 When to suspect cancer: "What signs during  
862 a digital rectal exam may indicate the  
863 need for a core needle biopsy?" The  
864 answer would be nodularity or fixation  
865 of the rectal mucosa.

866 I can also think about the implications of  
867 the findings. For example, "What  
868 should be done if nodularity or  
869 fixation is detected during the  
870 digital rectal exam?" The answer would  
871 be to perform a biopsy before  
872 proceeding.

873 Another question could be about the  
874 importance of the digital rectal exam  
875 in this context. "Why is a digital  
876 rectal exam important before  
877 transvesical prostatectomy?" The  
878 answer would be to assess for signs of  
879 cancer.

880 I should make sure each question is clear  
881 and can be answered without directly  
882 referencing the passage, just the  
883 information in it. Let me see if I can  
884 come up with more. Maybe about the  
885 specific zones of the prostate  
886 involved. "Which part of the prostate  
887 is targeted in transvesical  
888 prostatectomy?" The answer is the  
889 transitional zone.

890 Also, the procedure's focus: "What is the  
891 focus of transvesical prostatectomy in  
892 treating urinary obstruction?" The  
893 answer is removing the hypertrophic  
894 transitional zone.

895 I think that's a good set. I have eight  
896 pairs, but maybe I can find a couple  
897 more. Perhaps about the consequences  
898 of not doing the biopsy. "What is the  
899 consequence of not performing a core  
900 needle biopsy when suspicious findings  
901 are present?" The answer would be  
902 proceeding without knowing if cancer  
903 is present, which could be risky.

904 Wait, the passage doesn't explicitly state  
905 the consequences, so maybe that's  
906 beyond the given info. I should stick  
907 to what's in the passage.

908 Another angle: the patient's history.  
909 "What is included in the patient's  
910 history before transvesical  
911 prostatectomy?" The answer would be  
912 functional status inquiry.

913 I think that's a solid list. I'll make  
914 sure each question is clear and each  
915 answer is accurate based on the  
916 passage.

917 </think>

918 <qa-pair> What is the primary goal of  
919 transvesical prostatectomy? | The  
920 primary goal is to remove the  
921 hypertrophic transitional zone of the  
922 prostate to reduce urinary  
923 obstruction. </qa-pair>

924 <qa-pair> Is transvesical prostatectomy  
925 used to treat malignant lesions of the  
926 prostate? | No, it is not a surgical  
927 procedure for malignant lesions.  
928 </qa-pair>

929 <qa-pair> What assessments are typically  
930 performed before transvesical  
931 prostatectomy? | Appropriate history,  
932 including functional status inquiry,  
933 and physical examination are done  
934 prior to any investigation. </qa-pair>

935 <qa-pair> What is a normal finding during  
936 the digital rectal exam in a patient  
937 undergoing transvesical prostatectomy?  
938 | Enlarged lateral lobes can be easily  
939 felt, and the rectal mucosa should  
940 move freely over the prostate.  
941 </qa-pair>

942 <qa-pair> What signs during a digital  
943 rectal exam may indicate the need for

|     |                                           |                                                   |      |
|-----|-------------------------------------------|---------------------------------------------------|------|
| 944 | a core needle biopsy?   Nodularity or     | correctness. Your evaluation must                 | 992  |
| 945 | fixation of the rectal mucosa may         | result in a binary decision: "Correct"            | 993  |
| 946 | indicate the possibility of prostatic     | or "Incorrect".                                   | 994  |
| 947 | cancer. </qa-pair>                        |                                                   | 995  |
| 948 | <qa-pair> What should be done if          | ### EVALUATION CRITERIA ###                       | 996  |
| 949 | nodularity or fixation is detected        | You must adhere to the following strict           | 997  |
| 950 | during the digital rectal exam?   A       | criteria:                                         | 998  |
| 951 | core needle biopsy should be performed    |                                                   | 999  |
| 952 | before proceeding with the admission.     | 1. <b>**Factual Consistency:**</b> The "Generated | 1000 |
| 953 | </qa-pair>                                | Answer" must be factually consistent              | 1001 |
| 954 | <qa-pair> Why is a digital rectal exam    | with the "Ground Truth Answer". It                | 1002 |
| 955 | important before transvesical             | must not contain any information that             | 1003 |
| 956 | prostatectomy?   It is important to       | contradicts the ground truth.                     | 1004 |
| 957 | assess for signs of prostatic cancer,     | 2. <b>**Completeness:**</b> The "Generated        | 1005 |
| 958 | such as nodularity or fixation of the     | Answer" must address all parts of the             | 1006 |
| 959 | rectal mucosa. </qa-pair>                 | "Query". It is considered "Incorrect"             | 1007 |
| 960 | <qa-pair> Which part of the prostate is   | if it omits critical information that             | 1008 |
| 961 | targeted in transvesical                  | is present in the "Ground Truth                   | 1009 |
| 962 | prostatectomy?   The transitional zone    | Answer" and is necessary for a full               | 1010 |
| 963 | of the prostate is targeted. </qa-pair>   | response.                                         | 1011 |
| 964 | <qa-pair> What is the focus of            | 3. <b>**Relevance:**</b> The "Generated Answer"   | 1012 |
| 965 | transvesical prostatectomy in treating    | must directly answer the user's                   | 1013 |
| 966 | urinary obstruction?   The focus is on    | "Query". An answer that is factually              | 1014 |
| 967 | removing the hypertrophic transitional    | correct but irrelevant to the question            | 1015 |
| 968 | zone of the prostate. </qa-pair>          | is "Incorrect".                                   | 1016 |
| 969 | <qa-pair> What is included in the         |                                                   | 1017 |
| 970 | patient's history before transvesical     | <b>**Important Note:**</b> Differences in         | 1018 |
| 971 | prostatectomy?   The patient's history    | phrasing, verbosity, or style between             | 1019 |
| 972 | includes a functional status inquiry.     | the "Generated Answer" and the "Ground            | 1020 |
| 973 | </qa-pair>                                | Truth Answer" are acceptable as long              | 1021 |
| 974 |                                           | as the core semantic meaning is the               | 1022 |
| 975 |                                           | same and the criteria above are met.              | 1023 |
| 976 | Here is the passage for which you need to |                                                   |      |
| 977 | generate question-answer pairs            |                                                   |      |
| 978 |                                           | B.1. Instruction prompt prefix for                | 1024 |
| 979 | PASSAGE:                                  | LLM-as-judge                                      | 1025 |
| 980 | {text_chunk}                              |                                                   |      |
| 981 |                                           | ### INSTRUCTIONS ###                              | 1026 |
| 982 | RESPONSE:                                 | Follow these steps to generate your               | 1027 |
|     |                                           | evaluation:                                       | 1028 |
|     |                                           |                                                   | 1029 |
| 983 | Appendix B. System prompt for             | 1. <b>**Analyze the Query:**</b> Carefully read   | 1030 |
| 984 | LLM-as-judge                              | the user's "Query" to understand the              | 1031 |
|     |                                           | user's full intent and all a-priori               | 1032 |
| 985 | ### ROLE AND OBJECTIVE ###                | information.                                      | 1033 |
| 986 | You are an impartial and meticulous AI    | 2. <b>**Study the Ground Truth:**</b> Read the    | 1034 |
| 987 | evaluator. Your objective is to           | "Ground Truth Answer" to understand               | 1035 |
| 988 | determine if a "Generated Answer"         | the complete and factually correct                | 1036 |
| 989 | correctly and completely answers a        | response. This is your gold standard.             | 1037 |
| 990 | given "Query", using the "Ground Truth    | 3. <b>**Compare:**</b> Compare the "Generated     | 1038 |
| 991 | Answer" as the definitive source of       | Answer" against the "Ground Truth                 | 1039 |

|      |                                                  |      |
|------|--------------------------------------------------|------|
| 1040 | Answer" based on the <b>**Factual</b>            | 1091 |
| 1041 | <b>Consistency**</b> and <b>**Completeness**</b> | 1092 |
| 1042 | criteria.                                        |      |
| 1043 | 4. <b>**Final Judgment:**</b> Based on your      | 1093 |
| 1044 | comparison, make a final binary                  | 1094 |
| 1045 | judgment.                                        | 1095 |
| 1046 | 5. <b>**Output Format:**</b> Provide your        | 1096 |
| 1047 | response in the following format                 | 1097 |
| 1048 | <think> Your reasoning here... </think>          | 1098 |
| 1049 | <answer> correct OR incorrect </answer>          | 1099 |
| 1050 |                                                  | 1100 |
| 1051 | Here are some examples                           | 1101 |
| 1052 |                                                  | 1102 |
| 1053 | <b>**Example 1**</b>                             | 1103 |
| 1054 |                                                  | 1104 |
| 1055 | QUERY                                            | 1105 |
| 1056 | What is the escape velocity from the             | 1106 |
| 1057 | surface of Earth?                                | 1107 |
| 1058 |                                                  | 1108 |
| 1059 | GROUND TRUTH ANSWER                              | 1109 |
| 1060 | The escape velocity from Earth's surface         | 1110 |
| 1061 | is approximately 11.2 kilometers per             | 1111 |
| 1062 | second (km/s), which is about 40,320             | 1112 |
| 1063 | kilometers per hour (km/h) or 25,000             | 1113 |
| 1064 | miles per hour (mph).                            | 1114 |
| 1065 |                                                  | 1115 |
| 1066 | GENERATED ANSWER                                 | 1116 |
| 1067 | To escape Earth's gravity from the               | 1117 |
| 1068 | surface, an object needs to reach a              | 1118 |
| 1069 | speed of about 11.2 km/s.                        | 1119 |
| 1070 |                                                  | 1120 |
| 1071 | YOUR RESPONSE                                    | 1121 |
| 1072 | <think> Step 1: The query asks for Earth's       | 1122 |
| 1073 | escape velocity. Step 2: The ground              | 1123 |
| 1074 | truth states it is 11.2 km/s. Step 3:            | 1124 |
| 1075 | The generated answer also states it is           | 1125 |
| 1076 | 11.2 km/s. Step 4: The generated                 | 1126 |
| 1077 | answer is factually consistent and               | 1127 |
| 1078 | directly answers the query. While less           | 1128 |
| 1079 | detailed than the ground truth, it               | 1129 |
| 1080 | does not omit the critical piece of              | 1130 |
| 1081 | information and contains no                      | 1131 |
| 1082 | contradictions. Therefore, it is                 | 1132 |
| 1083 | correct. </think>                                | 1133 |
| 1084 | <answer> correct </answer>                       | 1134 |
| 1085 |                                                  | 1135 |
| 1086 | <b>**Example 2**</b>                             | 1136 |
| 1087 |                                                  | 1137 |
| 1088 | QUERY                                            | 1138 |
| 1089 | Who was the second person to walk on the         | 1139 |
| 1090 | moon?                                            | 1140 |
|      |                                                  | 1141 |

## GROUND TRUTH ANSWER

Neil Armstrong was the first; Buzz Aldrin was second.

## GENERATED ANSWER

The second man on the moon was Michael Collins.

## YOUR RESPONSE

<think> Step 1: The query asks for the second person on the Moon. Step 2: The ground truth identifies this person as Buzz Aldrin. Step 3: The generated answer incorrectly identifies the person as Michael Collins. Step 4: This is a direct factual contradiction with the ground truth. Therefore, the answer is incorrect. </think>  
<answer> incorrect </answer>

**\*\*Example 3\*\***

## QUERY

What are Newton's first two laws of motion?

## GROUND TRUTH ANSWER

Newton's first law states that an object will not change its motion unless a force acts on it. The second law states that the force on an object is equal to its mass times its acceleration.

## GENERATED ANSWER

Newton's first law is the law of inertia, stating an object in motion stays in motion.

## YOUR RESPONSE

<think> Step 1: The query asks for Newton's first AND second laws. Step 2: The ground truth provides both laws. Step 3: The generated answer only provides the first law. Step 4: The generated answer is incomplete as it omits a critical part of the information required by the query and present in the ground truth. Therefore, it is incorrect. </think>  
<answer> incorrect </answer>

|      |                                                        |                                                        |      |
|------|--------------------------------------------------------|--------------------------------------------------------|------|
| 1142 |                                                        | Create new sub-questions in the following              | 1186 |
| 1143 | Here are the "Query", the "Ground Truth                | format but do NOT answer the question.                 | 1187 |
| 1144 | Answer", and the "Generated Answer".                   | Respond in the following format:                       | 1188 |
| 1145 |                                                        |                                                        | 1189 |
| 1146 | QUERY                                                  | <think> Your reasoning here... </think>                | 1190 |
| 1147 | {query}                                                | <sub-question> The first sub-question...               | 1191 |
| 1148 |                                                        | </sub-question>                                        | 1192 |
| 1149 | GROUND TRUTH ANSWER                                    | <sub-question> The second sub-question...              | 1193 |
| 1150 | {ground_truth_answer}                                  | </sub-question>                                        | 1194 |
| 1151 |                                                        | ...                                                    | 1195 |
| 1152 | GENERATED ANSWER                                       | <sub-question> The last sub-question...                | 1196 |
| 1153 | {generated_answer}                                     | </sub-question>                                        | 1197 |
| 1154 |                                                        |                                                        |      |
| 1155 | YOUR RESPONSE                                          |                                                        |      |
|      |                                                        |                                                        |      |
| 1156 | <b>Appendix C. Prompts Used in the</b>                 | <b>C.2. Answer Generation from Context</b>             | 1198 |
| 1157 | <b>Surgical Information</b>                            | <b>Prompt</b>                                          | 1199 |
| 1158 | <b>Assistant</b>                                       |                                                        |      |
| 1159 | This appendix contains all the prompts used in         | This prompt is used to generate answers from re-       | 1200 |
| 1160 | the Surgical Information Assistant codebase. These     | trieved context for each sub-question. This results in | 1201 |
| 1161 | prompts are used to guide the language models in       | multiple LLM calls, but can be run asynchronously:     | 1202 |
| 1162 | performing various tasks such as question decomposi-   |                                                        | 1203 |
| 1163 | tion, information retrieval, answer synthesis, search- | Based on the given question and context,               | 1204 |
| 1164 | ing a fallback data-store, best-effort answer genera-  | generate an answer.                                    | 1205 |
| 1165 | tion, and follow-up question generation.               | Question: {question}                                   | 1206 |
|      |                                                        | Context: {context}                                     | 1207 |
|      |                                                        |                                                        | 1208 |
| 1166 | <b>C.1. Question Decomposition Prompt</b>              | Think step-by-step and make sure to reason             | 1209 |
| 1167 | This prompt is used to break down complex surgical     | through how to generate an answer.                     | 1210 |
| 1168 | questions into simpler sub-questions:                  | ONLY rely on the given context to                      | 1211 |
|      |                                                        | generate the answer.                                   | 1212 |
|      |                                                        |                                                        | 1213 |
| 1169 | You are an expert at breaking complex                  | Include snippets of the context that                   | 1214 |
| 1170 | surgical questions into simpler ones.                  | support your answer. Do NOT use any                    | 1215 |
| 1171 | Break the following question into                      | information outside of the given                       | 1216 |
| 1172 | smaller sub-questions:                                 | context to generate the answer.                        | 1217 |
| 1173 |                                                        |                                                        | 1218 |
| 1174 | Question: {question}                                   | Respond in the following format:                       | 1219 |
| 1175 |                                                        |                                                        | 1220 |
| 1176 | Each sub-question should be independent                | <think> Your reasoning here... </think>                | 1221 |
| 1177 | and answerable on it's own without                     | <answer> The generated answer... </answer>             | 1222 |
| 1178 | needing reference to other                             | <snippet> First relevant snippet from the              | 1223 |
| 1179 | sub-questions. Think of at least 3                     | context... </snippet>                                  | 1224 |
| 1180 | sub-questions but no more than 7.                      | <snippet> Second relevant snippet from the             | 1225 |
| 1181 |                                                        | context... </snippet>                                  | 1226 |
| 1182 | Think step-by-step and make sure to reason             | ...                                                    | 1227 |
| 1183 | through how break the question into                    | <snippet> The last relevant snippet from               | 1228 |
| 1184 | sub-questions.                                         | the context </snippet>                                 | 1229 |
| 1185 |                                                        |                                                        |      |

|      |                                                          |                                                    |      |
|------|----------------------------------------------------------|----------------------------------------------------|------|
| 1230 | <b>C.3. Prompt for answer generation without</b>         | what additional questions should be                | 1277 |
| 1231 | <b>context</b>                                           | asked.                                             | 1278 |
| 1232 | This prompt is used to generate answers for sub-         |                                                    | 1279 |
| 1233 | questions when no context is available (for ablation     | Original Question:                                 | 1280 |
| 1234 | experiments).                                            | {original_question}                                | 1281 |
|      |                                                          |                                                    | 1282 |
| 1235 | You are a medical expert specializing in                 | Knowledge:                                         | 1283 |
| 1236 | surgery. Answer the following question                   | {answers}                                          | 1284 |
| 1237 | using your knowledge of surgical                         |                                                    | 1285 |
| 1238 | procedures, anatomy, and medical                         | Think step-by-step to reason through you           | 1286 |
| 1239 | practices.                                               | answer and consider the relevant                   | 1287 |
| 1240 |                                                          | information. Respond in the following              | 1288 |
| 1241 | Question: {question}                                     | format:                                            | 1289 |
| 1242 |                                                          | <think> Your reasoning here... </think>            | 1290 |
| 1243 | Think step-by-step and provide a                         | <can_answer> yes OR no </can_answer>               | 1291 |
| 1244 | comprehensive answer based on your                       | <answer> The answer to the original                | 1292 |
| 1245 | medical knowledge. If you're uncertain                   | question... </answer>                              | 1293 |
| 1246 | about any aspect, please indicate that                   | <new_questions> The first new                      | 1294 |
| 1247 | in your response.                                        | sub-question... </new_questions>                   | 1295 |
| 1248 |                                                          | <new_questions> The second new                     | 1296 |
| 1249 | Respond in the following format:                         | sub-question... </new_questions>                   | 1297 |
| 1250 |                                                          | ...                                                | 1298 |
| 1251 | <think> Your reasoning here... </think>                  | <new questions> The last new sub-question          | 1299 |
| 1252 | <answer> The generated answer based on                   | </new_questions>                                   | 1300 |
| 1253 | your medical knowledge... </answer>                      |                                                    |      |
| 1254 | <confidence> High/Medium/Low - your                      |                                                    |      |
| 1255 | confidence level in this answer                          |                                                    |      |
| 1256 | </confidence>                                            |                                                    |      |
|      |                                                          | <b>C.5. Wikipedia Search Prompt</b>                | 1301 |
|      |                                                          | This prompt is used to generate search queries for | 1302 |
|      |                                                          | Wikipedia:                                         | 1303 |
| 1257 | <b>C.4. Answer Synthesis Prompt</b>                      | Given the following question, generate 3           | 1304 |
| 1258 | This prompt is used to synthesize answers from mul-      | search queries that would help find                | 1305 |
| 1259 | multiple sub-questions or route for further iteration in | relevant information on Wikipedia. The             | 1306 |
| 1260 | the DeRetSyn system.                                     | queries should be specific and focused             | 1307 |
|      |                                                          | on the key concepts in the question.               | 1308 |
|      |                                                          |                                                    | 1309 |
| 1261 | You are a reasoning engine. Given the                    | Question: {question}                               | 1310 |
| 1262 | following sub-question answers,                          |                                                    | 1311 |
| 1263 | determine whether they are enough to                     | Respond in the following format:                   | 1312 |
| 1264 | fully answer the original question.                      | <query>first search query</query>                  | 1313 |
| 1265 | ONLY rely on the knowledge to                            | <query>second search query</query>                 | 1314 |
| 1266 | determine whether the question can be                    | <query>third search query</query>                  | 1315 |
| 1267 | answered.                                                |                                                    |      |
| 1268 |                                                          |                                                    |      |
| 1269 | If yes, then provide the answer. Make your               | <b>C.6. Wikipedia Context Synthesis Prompt</b>     | 1316 |
| 1270 | answer detailed and structured with                      | This prompt is used to synthesize information from | 1317 |
| 1271 | sections, as appropriate. Include as                     | Wikipedia contexts:                                | 1318 |
| 1272 | much relevant information as possible                    |                                                    |      |
| 1273 | from the knowledge provided.                             | You are a reasoning engine. Given the              | 1319 |
| 1274 |                                                          | following question and Wikipedia                   | 1320 |
| 1275 | If you determine that you cannot answer                  | contexts, synthesize the information               | 1321 |
| 1276 | the original question, then suggest                      | to provide a comprehensive answer.                 | 1322 |

|      |                                                      |                                                    |      |
|------|------------------------------------------------------|----------------------------------------------------|------|
| 1323 |                                                      |                                                    | 1369 |
| 1324 | Question: {question}                                 | Final Answer:                                      | 1370 |
| 1325 |                                                      | {final_answer}                                     | 1371 |
| 1326 | Wikipedia Contexts:                                  |                                                    | 1372 |
| 1327 | {contexts}                                           | Think step-by-step to reason through your          | 1373 |
| 1328 |                                                      | answer and consider the relevant                   | 1374 |
| 1329 | Think step-by-step to reason through your            | information. Respond in the following              | 1375 |
| 1330 | answer and consider the relevant                     | format:                                            | 1376 |
| 1331 | information from the contexts. Respond               | <think> Your reasoning here... </think>            | 1377 |
| 1332 | in the following format:                             | <follow_up_questions> follow-up question           | 1378 |
| 1333 | <think> Your reasoning here... </think>              | here... </follow_up_questions>                     | 1379 |
| 1334 | <answer> The synthesized answer...                   | <follow_up_questions> follow-up question           | 1380 |
| 1335 | </answer>                                            | here... </follow_up_questions>                     | 1381 |
|      |                                                      | <follow_up_questions> follow-up question           | 1382 |
|      |                                                      | here... </follow_up_questions>                     | 1383 |
| 1336 | <b>C.7. Best Effort Answer Generation Prompt</b>     |                                                    |      |
| 1337 | This prompt is used when the system needs to gen-    | <b>C.9. Chain-of-Thought Generation Prompt</b>     | 1384 |
| 1338 | erate a best-effort answer using Wikipedia:          | This prompt is used to generate detailed reasoning | 1385 |
| 1339 | You are a reasoning engine. Given the                | for answers:                                       | 1386 |
| 1340 | following original question and                      |                                                    |      |
| 1341 | sub-question answers, formulate an                   | You are a reasoning engine. Based on the           | 1387 |
| 1342 | answer to the best of your ability.                  | following question and knowledge,                  | 1388 |
| 1343 |                                                      | provide a detailed, step-by-step                   | 1389 |
| 1344 | Original Question:                                   | reasoning to arrive at an answer.                  | 1390 |
| 1345 | {original_question}                                  | Include at least 3 steps, but more as              | 1391 |
| 1346 |                                                      | needed.                                            | 1392 |
| 1347 | Knowledge:                                           |                                                    | 1393 |
| 1348 | {state["answers"]}                                   | Question:                                          | 1394 |
| 1349 | {state["wikipedia_results"]}                         | {state["original_question"]}                       | 1395 |
| 1350 |                                                      |                                                    | 1396 |
| 1351 | Think step-by-step to reason through you             | Knowledge:                                         | 1397 |
| 1352 | answer and consider the relevant                     | {state["answers"]}                                 | 1398 |
| 1353 | information. Respond in the following                | {state["wikipedia_results"] if                     | 1399 |
| 1354 | format:                                              | "wikipedia_results" in state else ""}              | 1400 |
| 1355 | <think> Your reasoning here... </think>              |                                                    | 1401 |
| 1356 | <answer> The answer to the original                  | Provide your response in this format:              | 1402 |
| 1357 | question... </answer>                                |                                                    | 1403 |
|      |                                                      | <think> Your reasoning here... </think>            | 1404 |
|      |                                                      | <answer> The final answer here... </answer>        | 1405 |
| 1358 | <b>C.8. Follow-up Question Generation Prompt</b>     |                                                    |      |
| 1359 | This prompt is used to generate follow-up questions: | <b>Appendix D. Chat interaction</b>                | 1406 |
| 1360 | You are a reasoning engine. Given the                | <b>management prompts</b>                          | 1407 |
| 1361 | following original question and final                |                                                    |      |
| 1362 | answer, generate 3 follow-up questions               | The following prompts are used to manage the chat- | 1408 |
| 1363 | that help expand on the original                     | interface with the Surgical Information Assistant. | 1409 |
| 1364 | question and the answer in a step-wise               |                                                    |      |
| 1365 | manner.                                              | <b>D.1. Surgery Topic Classification Prompt</b>    | 1410 |
| 1366 |                                                      | This prompt is used to determine if a question is  | 1411 |
| 1367 | Original Question:                                   | about surgery. If so, the DeRetSyn system is trig- | 1412 |
| 1368 | {original_question}                                  |                                                    |      |

|      |                                                    |                                         |      |
|------|----------------------------------------------------|-----------------------------------------|------|
| 1413 | gered. If not, the LLM answers with general knowl- | rather requesting to explain a          | 1463 |
| 1414 | edge acknowledging it may hallucinate and directs  | previous response. </thinking>          | 1464 |
| 1415 | the user to ask a more relevant question:          | <answer> no </answer>                   | 1465 |
|      |                                                    |                                         | 1466 |
| 1416 | Determine if the following question                | Question:                               | 1467 |
| 1417 | requires access to specific medical                | What are some core differences between  | 1468 |
| 1418 | documents related to detailed surgical             | robotic and laparoscopic inguinal       | 1469 |
| 1419 | information to be answered accurately.             | hernia?                                 | 1470 |
| 1420 | Think step-by-step and reason through your         | Response:                               | 1471 |
| 1421 | answer. Respond in the following                   | <thinking> The question is asking about | 1472 |
| 1422 | format:                                            | the differences between robotic and     | 1473 |
| 1423 |                                                    | laparoscopic inguinal hernia. Both      | 1474 |
| 1424 | <thinking> Your reasoning here...                  | robotic and laparoscopic surgery        | 1475 |
| 1425 | </thinking>                                        | involve surgery on the inguinal         | 1476 |
| 1426 | <answer> yes OR no </answer>                       | hernia. This is clearly a question      | 1477 |
| 1427 |                                                    | about surgery and requires              | 1478 |
| 1428 | Here are some examples:                            | investigation into documentation to     | 1479 |
| 1429 |                                                    | answer. </thinking>                     | 1480 |
| 1430 | Question:                                          | <answer> yes </answer>                  | 1481 |
| 1431 | What is the primary purpose of the                 |                                         | 1482 |
| 1432 | coronary artery bypass graft?                      | Question:                               | 1483 |
| 1433 | Response:                                          | {question}                              | 1484 |
| 1434 | <thinking> The question is asking about a          | Response:                               | 1485 |
| 1435 | coronary bypass graft which is related             |                                         |      |
| 1436 | to surgery. So yes, this question is               |                                         |      |
| 1437 | about surgery. </thinking>                         |                                         |      |
| 1438 | <answer> yes </answer>                             |                                         |      |
| 1439 |                                                    |                                         |      |
| 1440 | Question:                                          |                                         |      |
| 1441 | Is machine learning useful for solving             |                                         |      |
| 1442 | complex medical problems?                          |                                         |      |
| 1443 | Response:                                          |                                         |      |
| 1444 | <thinking> The question is asking about            |                                         |      |
| 1445 | machine learning as a tool for solving             |                                         |      |
| 1446 | complex medical problems. While the                |                                         |      |
| 1447 | question does specify medical                      |                                         |      |
| 1448 | problems, it does not refer to surgery             |                                         |      |
| 1449 | or topics related to surgery.                      |                                         |      |
| 1450 | </thinking>                                        |                                         |      |
| 1451 | <answer> no </answer>                              |                                         |      |
| 1452 |                                                    |                                         |      |
| 1453 | Question:                                          |                                         |      |
| 1454 | Can you elaborate on your previous                 |                                         |      |
| 1455 | response about suturing or rephrase it?            |                                         |      |
| 1456 | Response:                                          |                                         |      |
| 1457 | <thinking> The question is asking for an           |                                         |      |
| 1458 | explanation of suturing that was given             |                                         |      |
| 1459 | earlier in the conversation. While the             |                                         |      |
| 1460 | question does mention suturing which               |                                         |      |
| 1461 | is related to surgery, it is not                   |                                         |      |
| 1462 | asking about suturing specifically but             |                                         |      |

## D.2. Context-Aware Input Update Prompt

This prompt is used to update user input with context from chat history:

Given the following chat history and a new user input, update the user input to include any relevant context from the chat history. Only add necessary context, and keep the updated input concise.

Think step-by-step and reason through your answer. Respond in the following format:

<thinking> Your reasoning here...  
</thinking>  
<updated\_input> Updated user input here...  
</updated\_input>

Here are some examples:

CHAT HISTORY:

User: What are the main types of sutures used in surgery?

Assistant: The main types of sutures used in surgery are absorbable and



|      |                                        |                                            |      |
|------|----------------------------------------|--------------------------------------------|------|
| 1511 | non-absorbable sutures. Absorbable     | User: Are there any alternatives to this   | 1561 |
| 1512 | sutures dissolve over time, while      | procedure?                                 | 1562 |
| 1513 | non-absorbable sutures need to be      | Assistant: Yes, there are alternatives to  | 1563 |
| 1514 | removed. Common absorbable sutures     | laparotomy, particularly minimally         | 1564 |
| 1515 | include catgut and synthetic materials | invasive techniques. The main              | 1565 |
| 1516 | like polyglycolic acid. Non-absorbable | alternative is laparoscopy, also known     | 1566 |
| 1517 | sutures are often made of materials    | as keyhole surgery. In laparoscopy,        | 1567 |
| 1518 | like nylon or silk.                    | several small incisions are made           | 1568 |
| 1519 | User: How long do absorbable sutures   | instead of one large incision. A           | 1569 |
| 1520 | typically last?                        | camera and specialized instruments are     | 1570 |
| 1521 | Assistant: The duration of absorbable  | inserted through these small incisions     | 1571 |
| 1522 | sutures varies depending on the        | to perform the surgery. This technique     | 1572 |
| 1523 | material used. Generally, they can     | often results in less pain, faster         | 1573 |
| 1524 | last anywhere from a few days to       | recovery, and smaller scars compared       | 1574 |
| 1525 | several months. For example,           | to traditional laparotomy.                 | 1575 |
| 1526 | fast-absorbing sutures may dissolve    |                                            | 1576 |
| 1527 | within 7-10 days, while                | NEW USER INPUT:                            | 1577 |
| 1528 | slower-absorbing sutures can take      | What are the risks?                        | 1578 |
| 1529 | 60-90 days or even longer.             |                                            | 1579 |
| 1530 | NEW USER INPUT:                        | RESPONSE:                                  | 1580 |
| 1531 | What about non-absorbable ones?        | <thinking> The user is asking about risks, | 1581 |
| 1532 | RESPONSE:                              | but it's not clear whether they're         | 1582 |
| 1533 | <thinking> Considering the previous    | referring to laparotomy or                 | 1583 |
| 1534 | discussion the user is referring to    | laparoscopy, both of which were            | 1584 |
| 1535 | non-absorbable sutures. Specifically,  | discussed in the previous messages.        | 1585 |
| 1536 | they are asking about the lifespan or  | Since laparotomy was the original          | 1586 |
| 1537 | removal time-frame for non-absorbable  | topic and laparoscopy was introduced       | 1587 |
| 1538 | sutures. I'll restate the question to  | as an alternative, it would be helpful     | 1588 |
| 1539 | include this context from the chat     | to ask about the risks of both             | 1589 |
| 1540 | history. </thinking>                   | procedures for a comprehensive answer.     | 1590 |
| 1541 | <updated_input> What is the typical    | </thinking>                                | 1591 |
| 1542 | lifespan or removal timeframe for      | <updated_input> What are the risks         | 1592 |
| 1543 | non-absorbable sutures used in         | associated with both laparotomy and        | 1593 |
| 1544 | surgery? </updated_input>              | laparoscopy procedures?                    | 1594 |
| 1545 |                                        | </updated_input>                           | 1595 |
| 1546 |                                        |                                            | 1596 |
| 1547 |                                        |                                            | 1597 |
| 1548 | CHAT HISTORY:                          |                                            | 1598 |
| 1549 | User: What is a laparotomy?            | CHAT HISTORY:                              | 1599 |
| 1550 | Assistant: A laparotomy is a surgical  | User: What are the potential complications | 1600 |
| 1551 | procedure that involves making a large | of laparoscopic surgery?                   | 1601 |
| 1552 | incision in the abdomen to gain access | Assistant: Laparoscopic surgery can have   | 1602 |
| 1553 | to the abdominal cavity. It allows     | several potential complications,           | 1603 |
| 1554 | surgeons to examine the abdominal      | including:                                 | 1604 |
| 1555 | organs, diagnose problems, and perform | 1. Infection: Laparoscopic surgery can     | 1605 |
| 1556 | necessary treatments. Laparotomies are | lead to infections, especially in          | 1606 |
| 1557 | used for various purposes, including   | patients with infections that can be       | 1607 |
| 1558 | exploratory surgery, treatment of      | spread through the abdominal cavity.       | 1608 |
| 1559 | abdominal trauma, and removal of       | 2. Stool bleeding: Laparoscopic surgery    | 1609 |
| 1560 | tumors.                                | can lead to stool bleeding, especially     | 1610 |

|      |                                                      |      |
|------|------------------------------------------------------|------|
| 1611 | if the surgical instrument is inserted               | 1658 |
| 1612 | directly into the abdominal cavity.                  | 1659 |
| 1613 | 3. Pain: Laparoscopic surgery can be                 | 1660 |
| 1614 | painful, especially for patients with                | 1661 |
| 1615 | pre-existing conditions or those who                 | 1662 |
| 1616 | have had previous laparoscopic                       | 1663 |
| 1617 | surgeries.                                           | 1664 |
| 1618 |                                                      | 1665 |
| 1619 | NEW USER INPUT:                                      |      |
| 1620 | Can you think of any more?                           |      |
| 1621 |                                                      |      |
| 1622 | RESPONSE:                                            |      |
| 1623 | <thinking> The user is asking if there are           |      |
| 1624 | any more complications, but it's                     |      |
| 1625 | important to note that the original                  |      |
| 1626 | question was about laparoscopic                      |      |
| 1627 | surgery, not about potential                         |      |
| 1628 | complications. I'll restate the                      |      |
| 1629 | question to clarify that the original                |      |
| 1630 | topic was laparoscopic surgery.                      |      |
| 1631 | </thinking>                                          |      |
| 1632 | <updated_input> Are there any more                   |      |
| 1633 | potential complications associated                   |      |
| 1634 | with laparoscopic surgery besides                    |      |
| 1635 | infection, stool bleeding, and pain?                 |      |
| 1636 | </updated_input>                                     |      |
| 1637 |                                                      |      |
| 1638 |                                                      |      |
| 1639 |                                                      |      |
| 1640 | CHAT HISTORY:                                        |      |
| 1641 | {formatted_history}                                  |      |
| 1642 |                                                      |      |
| 1643 | New User Input:                                      |      |
| 1644 | {user_input}                                         |      |
| 1645 |                                                      |      |
| 1646 | RESPONSE:                                            |      |
| 1647 | <b>Appendix E. Prompts used to test</b>              |      |
| 1648 | <b>alternative RAG</b>                               |      |
| 1649 | <b>paradigms</b>                                     |      |
| 1650 | <b>E.1. Chain-of-thought prompting without</b>       |      |
| 1651 | <b>context</b>                                       |      |
| 1652 | You are a medical expert. Please answer              |      |
| 1653 | the following question:                              |      |
| 1654 | Think step-by-step and provide a detailed            |      |
| 1655 | reasoning process to arrive at your                  |      |
| 1656 | answer. Include at least 3 steps in                  |      |
| 1657 | your reasoning, but more as needed.                  |      |
|      | Respond in the following format:                     |      |
|      | <think> Your reasoning here... </think>              |      |
|      | <answer> Your final answer here...                   |      |
|      | </answer>                                            |      |
|      | Question: {question}                                 |      |
|      | <b>E.2. Chain-of-thought prompting with</b>          |      |
|      | <b>context</b>                                       |      |
|      | You are a medical assistant specializing             |      |
|      | in surgical information. Use the                     |      |
|      | following context to answer the                      |      |
|      | question.                                            |      |
|      | If you cannot find the answer in the                 |      |
|      | context, say "I don't have enough                    |      |
|      | information to answer this question."                |      |
|      | Context:                                             |      |
|      | {context_docs}                                       |      |
|      | Question: {question}                                 |      |
|      | Think step-by-step to reason through your            |      |
|      | answer and consider the relevant                     |      |
|      | information from the context. Respond                |      |
|      | in the following format:                             |      |
|      | <think> Your reasoning here... </think>              |      |
|      | <answer> The answer to the question...               |      |
|      | </answer>                                            |      |
|      | <b>E.3. ReAct Agent System Prompt</b>                |      |
|      | This prompt is used for the ReAct agent in the eval- |      |
|      | uation scripts:                                      |      |
|      | You are a medical assistant specializing             |      |
|      | in surgical information. Your goal is                |      |
|      | to provide accurate and helpful                      |      |
|      | information about surgical procedures,               |      |
|      | techniques, and related medical                      |      |
|      | knowledge.                                           |      |
|      | When answering questions:                            |      |
|      | 1. Use the DocumentSearch tool to find               |      |
|      | relevant information in the surgical                 |      |
|      | database                                             |      |
|      | 2. Analyze the retrieved information                 |      |
|      | carefully                                            |      |

3. Provide comprehensive and accurate answers based on the retrieved content
  4. If the information is not available in the search results, acknowledge the limitations
  5. Think step-by-step to reason through complex questions
  6. Cite specific parts of the retrieved documents when appropriate
  7. Focus on providing factual medical information rather than opinions
- Remember accuracy is crucial. Provide all reasoning and the final answer.

## Appendix F. Prompt Design Principles

The prompts used in the Surgical Information Assistant follow several key design principles:

### F.1. Step-by-Step Reasoning

All prompts encourage the language model to think step-by-step and provide detailed reasoning before arriving at an answer. This approach, often referred to as chain-of-thought prompting, has been shown to improve the accuracy and reliability of language model outputs, especially for complex tasks.

### F.2. Structured Output Format

The prompts use a consistent structured output format with XML-like tags (e.g., `<think>`, `<answer>`, `<sub-question>`) to clearly separate different components of the response. This structured format makes it easier to parse and extract specific information from the language model's output.

### F.3. Few-Shot Examples

Several prompts include few-shot examples to demonstrate the expected reasoning process and output format. These examples help guide the language model to produce responses that follow the desired pattern and meet the quality standards.

### F.4. Task-Specific Instructions

Each prompt contains clear, task-specific instructions that define the role of the language model (e.g., "You

are an expert at breaking complex surgical questions into simpler ones") and the specific task it needs to perform. This helps focus the model's attention on the relevant aspects of the task.

### F.5. Context Awareness

The prompts are designed to make the language model aware of the context in which it operates, including the original question, retrieved information, and previous interactions. This context awareness is crucial for generating coherent and relevant responses.

## Appendix G. Example responses from different experimental designs

### G.1. Question 1

Why should soiled instruments be cleaned within twenty minutes of contamination?

Known answer: Soiled instruments should be cleaned within twenty minutes because stainless steel can experience corrosion from biological and chemical liquids.

Llama32 Deretsyn: The soiled instruments should be cleaned within twenty minutes of contamination to prevent the potential risks associated with them, including corrosion, injury from sharp instruments, and the spread of infection due to the presence of biological and chemical liquids. This time frame is significant because it is the time frame within which organic matter such as blood or tissue can be prevented from drying on the surface of the instrument. If not cleaned within this time frame, the consequences can include damage to the instruments, corrosion, and the potential for injury. Furthermore, there are specific guidelines that dictate the cleaning of soiled instruments within twenty minutes of contamination.

Llama32 RAG: Soiled instruments should be cleaned within twenty minutes of contamination to prevent the growth of

microorganisms and the drying of organic matter, which can lead to the formation of biofilms and make the instrument more difficult to clean and disinfect.

Llama32 React: Soiled instruments should be cleaned within twenty minutes of contamination to prevent the growth and spread of microorganisms. This is because microorganisms can multiply rapidly, especially in warm, moist environments, and can cause infections if not removed promptly.

GPT40: Soiled instruments should be cleaned within twenty minutes of contamination to prevent organic material from drying and adhering to the surface, to reduce the risk of biofilm formation that can make sterilization less effective, to minimize the risk of cross-contamination and infection, to maintain the integrity and functionality of the instruments, and to adhere to best practices in infection control.

Llama31: Soiled instruments should be cleaned within twenty minutes of contamination to prevent bacterial growth, biofilm formation, and subsequent infection transmission. This timeframe allows for effective cleaning and disinfection, reducing the risk of hospital-acquired infections and ensuring patient safety.

## G.2. Question 2:

What factors can put the liver remnant at risk for further ischemic injury postoperatively after liver resection surgery?

Known answer: Hypoxia, hypotension, septicemia, or drug toxicity can put the liver remnant at risk for further ischemic injury postoperatively.

Llama32 Deretsyn: The factors that can put the liver remnant at risk for further ischemic injury postoperatively include:

1. **Hemodynamic instability**: This can affect blood flow to the liver remnant and increase the risk of ischemic injury.
2. **Hyperdynamic circulation**: This can also affect blood flow to the liver remnant and increase the risk of ischemic injury.
3. **Septicemia**: This is a potential cause of ischemic injury in the liver remnant postoperatively.
4. **Drug toxicity**: This is another potential cause of ischemic injury in the liver remnant postoperatively.
5. **Volume expansion**: This can affect blood flow to the liver remnant and increase the risk of ischemic injury.
6. **Glycemic control**: Poor glycemic control can lead to hyperglycemia, which can contribute to ischemic injury in the liver remnant.
7. **Liver regeneration**: While liver regeneration is a natural process, it can also lead to changes in blood flow to the liver remnant, increasing the risk of ischemic injury.
8. **Ascites**: This can put pressure on the liver remnant and impair venous return to the heart, increasing the risk of ischemic injury.
9. **Bleeding**: This can lead to hemodynamic instability and affect blood flow to the liver remnant, increasing the risk of ischemic injury.
10. **Portal hypertension**: This can affect blood flow to the liver remnant and increase the risk of ischemic injury.
11. **Cardiac function**: Poor cardiac function can lead to hypotension and affect blood flow to the liver remnant, increasing the risk of ischemic injury.
12. **Coagulation status**: Abnormal coagulation status can lead to bleeding and affect blood flow to the liver remnant, increasing the risk of ischemic injury.
13. **Warm ischemia time**: Prolonged warm ischemia time can increase the risk of ischemic injury in the liver remnant.

|      |                                                  |                                           |      |
|------|--------------------------------------------------|-------------------------------------------|------|
| 1890 | 14. <b>**Liver function**</b> : Poor liver       | systemic and local hypoxia,               | 1941 |
| 1891 | function can affect blood flow to the            | inflammatory and oxidative stress         | 1942 |
| 1892 | liver remnant and increase the risk of           | related to ischemia-reperfusion           | 1943 |
| 1893 | ischemic injury.                                 | injury, pre-existing conditions that      | 1944 |
| 1894 | 15. <b>**Postoperative factors**</b> : Hypoxia,  | impair liver function (e.g.,              | 1945 |
| 1895 | hypotension, septicemia, drug                    | cirrhosis, steatosis, diabetes), poor     | 1946 |
| 1896 | toxicity, hyperdynamic circulation,              | postoperative hemodynamic management      | 1947 |
| 1897 | and hyperglycemia can all contribute             | (e.g., hypotension, inadequate            | 1948 |
| 1898 | to ischemic injury in the liver                  | resuscitation), and a small or            | 1949 |
| 1899 | remnant postoperatively.                         | insufficiently functional liver           | 1950 |
| 1900 | 16. <b>**Surgical procedure**</b> : The surgical | remnant that cannot meet metabolic        | 1951 |
| 1901 | procedure itself can increase the risk           | demands.                                  | 1952 |
| 1902 | of hypoxia and hypotension, prolong              | Llama31: The liver remnant is at risk for | 1953 |
| 1903 | warm ischemia time, and cause                    | further ischemic injury                   | 1954 |
| 1904 | hemodynamic instability, all of which            | postoperatively due to a combination      | 1955 |
| 1905 | can increase the risk of ischemic                | of factors, including:                    | 1956 |
| 1906 | injury in the liver remnant.                     |                                           | 1957 |
| 1907 |                                                  | - Hemodynamic factors (e.g., changes in   | 1958 |
| 1908 | These factors can all contribute to              | blood flow, blood pressure, or cardiac    | 1959 |
| 1909 | ischemic injury in the liver remnant             | output)                                   | 1960 |
| 1910 | postoperatively, either by affecting             | - Surgical factors (e.g., extent of liver | 1961 |
| 1911 | blood flow to the liver remnant or by            | resection, presence of major blood        | 1962 |
| 1912 | increasing the risk of hypoxia,                  | vessels in the area of resection)         | 1963 |
| 1913 | hypotension, septicemia, and drug                | - Patient-related factors (e.g., overall  | 1964 |
| 1914 | toxicity.                                        | health, age, presence of comorbidities)   | 1965 |
| 1915 | Llama32 RAG: Hypoxia, hypotension,               | - Specific conditions (e.g., small liver  | 1966 |
| 1916 | septicemia or drug toxicity, and                 | remnant, portal hypertension, biliary     | 1967 |
| 1917 | hyperdynamic circulation due to                  | obstruction, dehydration or               | 1968 |
| 1918 | cirrhosis or impaired liver function             | hypovolemia)                              | 1969 |
| 1919 | can put the liver remnant at risk for            | - Inadequate intraoperative and           | 1970 |
| 1920 | further ischemic injury                          | postoperative care (e.g., fluid           | 1971 |
| 1921 | postoperatively.                                 | management, blood pressure management,    | 1972 |
| 1922 | Llama32 React: The following factors can         | monitoring and management of              | 1973 |
| 1923 | put the liver remnant at risk for                | complications)                            | 1974 |
| 1924 | further ischemic injury                          |                                           |      |
| 1925 | postoperatively: 1. Warm ischemia                |                                           |      |
| 1926 | time, 2. Fatty or cirrhotic livers, 3.           |                                           |      |
| 1927 | Large resections, 4. Prolonged                   |                                           |      |
| 1928 | surgical time, 5. Blood loss and                 |                                           |      |
| 1929 | cardiovascular instability, 6.                   |                                           |      |
| 1930 | Non-steroidal anti-inflammatory drugs            |                                           |      |
| 1931 | (NSAIDs), 7. Paracetamol                         |                                           |      |
| 1932 | (acetaminophen) use, 8. Hypoglycemia,            |                                           |      |
| 1933 | 9. Hypothermia, 10. Poor patient                 |                                           |      |
| 1934 | selection.                                       |                                           |      |
| 1935 | GPT40: Factors that can put the liver            |                                           |      |
| 1936 | remnant at risk for further ischemic             |                                           |      |
| 1937 | injury postoperatively include                   |                                           |      |
| 1938 | vascular and perfusion issues (e.g.,             |                                           |      |
| 1939 | portal vein thrombosis, hepatic artery           |                                           |      |
| 1940 | injury, small-for-size syndrome),                |                                           |      |
